# Supplementary material for: Evaluation of Performance of Existing RO Drinking Water Stations in the North Central Province, Sri Lanka
Source: MDPI journal article supplement (doi:10.3390/membranes11060383), 2021-05-24
Supplement: s1 [file s1]

## Supplementary Materials

# Evaluation of Performance of Existing RO Drinking Water Stations in the North Central Province, Sri Lanka

Suresh Indika <sup>1,2,3</sup>, Yuansong Wei <sup>1,2,3,4,\*</sup>, Dazhou Hu <sup>1,2,3</sup>, Jegetheeswaran Ketharani <sup>5</sup>, Tharindu Ritigala <sup>1,2,3</sup>, Titus Cooray <sup>6</sup>, M.A.C.K. Hansima <sup>7</sup>, Madhubashini Makehelwala <sup>8</sup>, K.B.S.N. Jinadasa <sup>5</sup>, Sujithra K. Weragoda <sup>9</sup> and Rohan Weerasooriya <sup>4</sup>

<sup>1</sup> State Key Joint Laboratory of Environmental Simulation and Pollution Control, Research Center for Eco-Environmental Sciences, Chinese Academy of Sciences, Beijing 100085, China; indika\_st@rcees.ac.cn (S.I.); dzhu\_st@rcees.ac.cn (D.H.); tharindu\_st@rcees.ac.cn (T.R.)

<sup>2</sup> Laboratory of Water Pollution Control Technology, Research Center for Eco-Environmental Sciences, Chinese Academy of Sciences, Beijing 100085, China

<sup>3</sup> University of Chinese Academy of Sciences, Beijing 100049, China

<sup>4</sup> National Institute of Fundamental Studies, Hanthana Road, Kandy 20000, Sri Lanka; rohan.we@nifs.ac.lk

<sup>5</sup> Department of Civil Engineering, University of Peradeniya, Peradeniya 20400, Sri Lanka; ketha94@eng.pdn.ac.lk (J.K.); shamj@pdn.ac.lk (K.B.S.N.J.)

<sup>6</sup> Department of Applied Earth Sciences, Uva Wellassa University, Badulla 90000, Sri Lanka; titus@uwu.ac.lk

<sup>7</sup> Post Graduate Institute of Science (PGIS), University of Peradeniya, Peradeniya 20400, Sri Lanka; 127charithahansima@gmail.com

<sup>8</sup> China-Sri Lanka Joint Research and Demonstration Center for Water Technology, Ministry of Water Supply, Meewathura, Peradeniya 20400, Sri Lanka; madhu10w@yahoo.com

<sup>9</sup> National Water Supply and Drainage Board, Katugastota 20800, Sri Lanka; skwera7@gmail.com

\* Correspondence: yswei@rcees.ac.cn; Tel.: +86-10-6284-9690

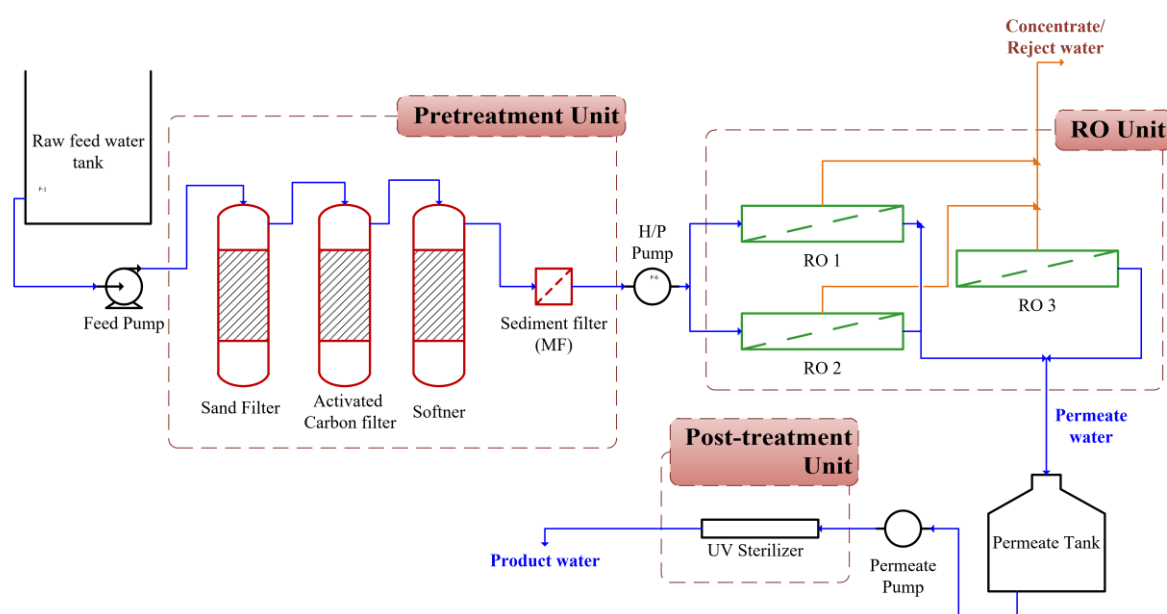

**Figure S1.** Process flow diagram of a typical RO system in the NCP

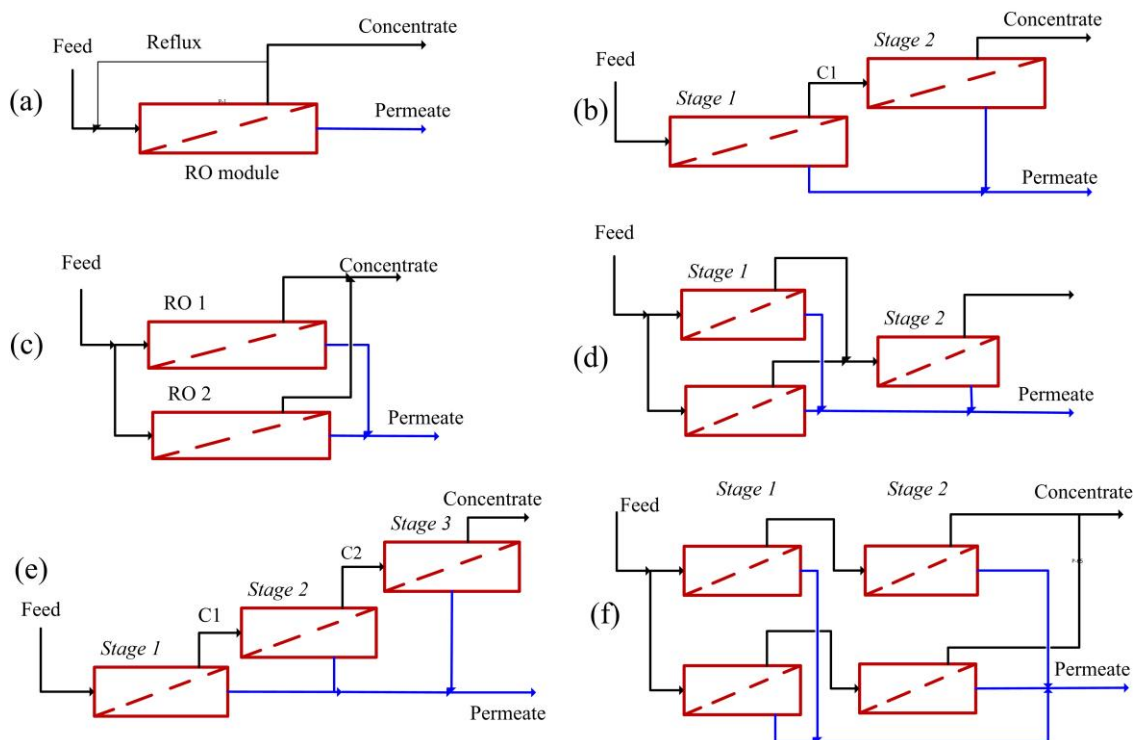

**Figure S2.** Different RO configurations that are common in NCP, Sri Lanka

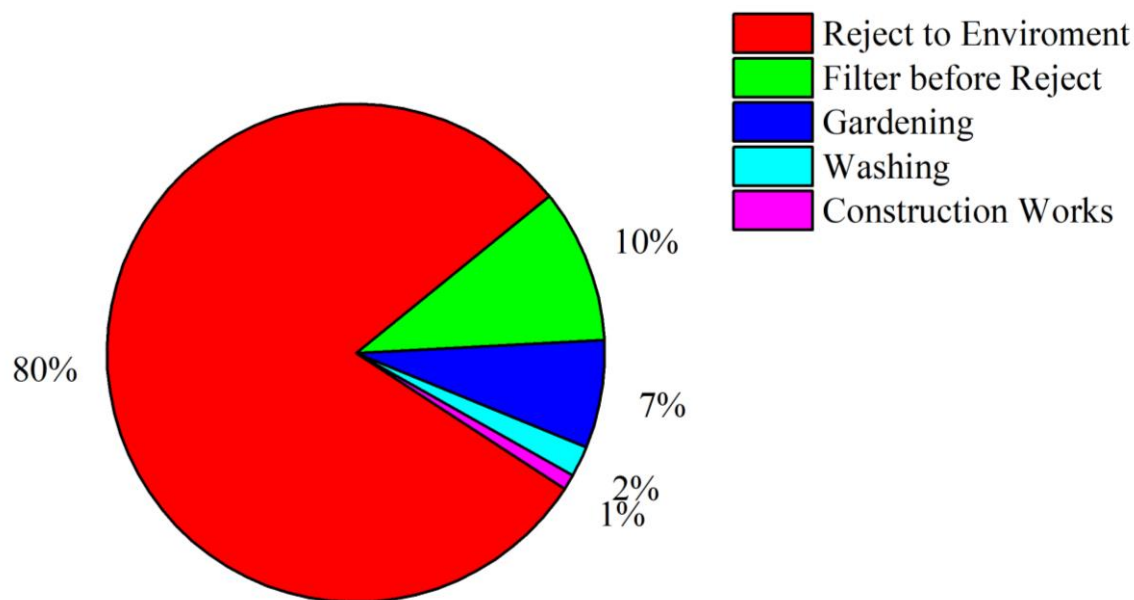

**Figure S3.** Different options for reject water handling

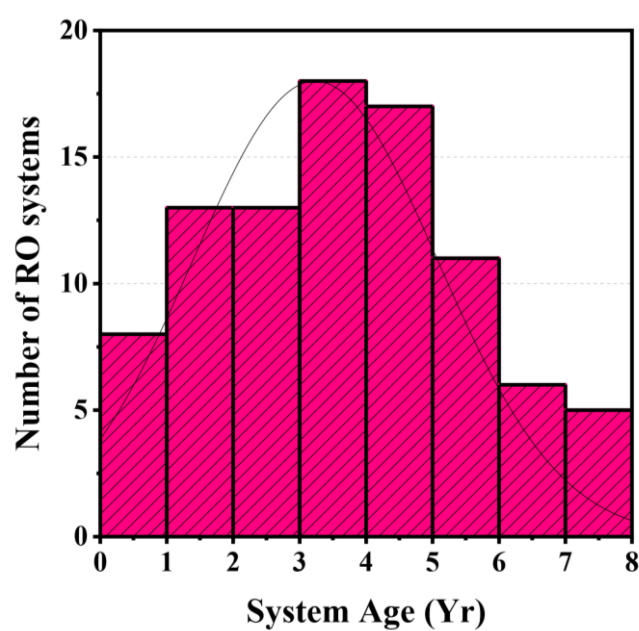

**Figure S4.** Number of RO systems with their system age (Y)

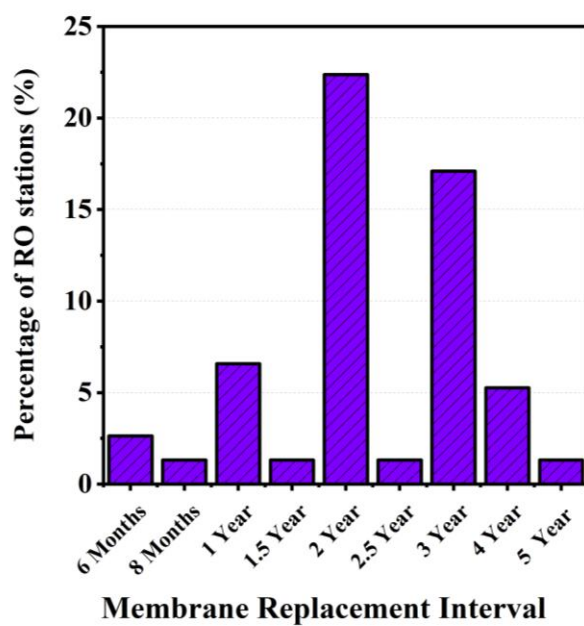

**Figure S5.** Percentage of the number of CBO operated RO facilities (y-Axis) in NCP with their Membrane Replacement Intervals (x-Axis)

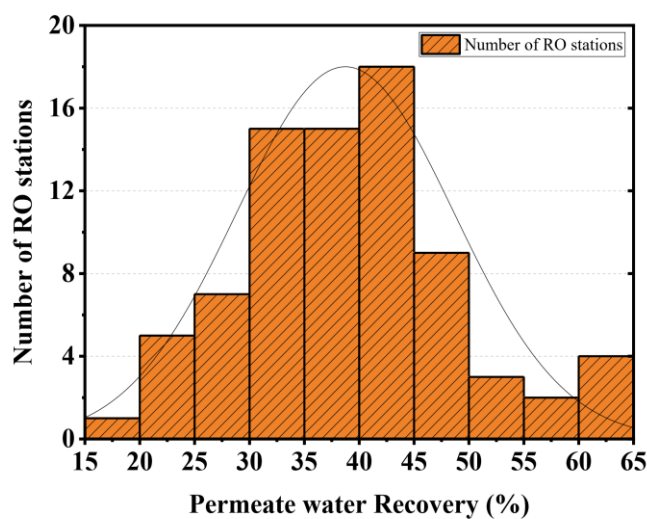

Figure S6. Number of RO plants (y-axis) with the categorization by their Water Recovery as a Percentage (x-axis)

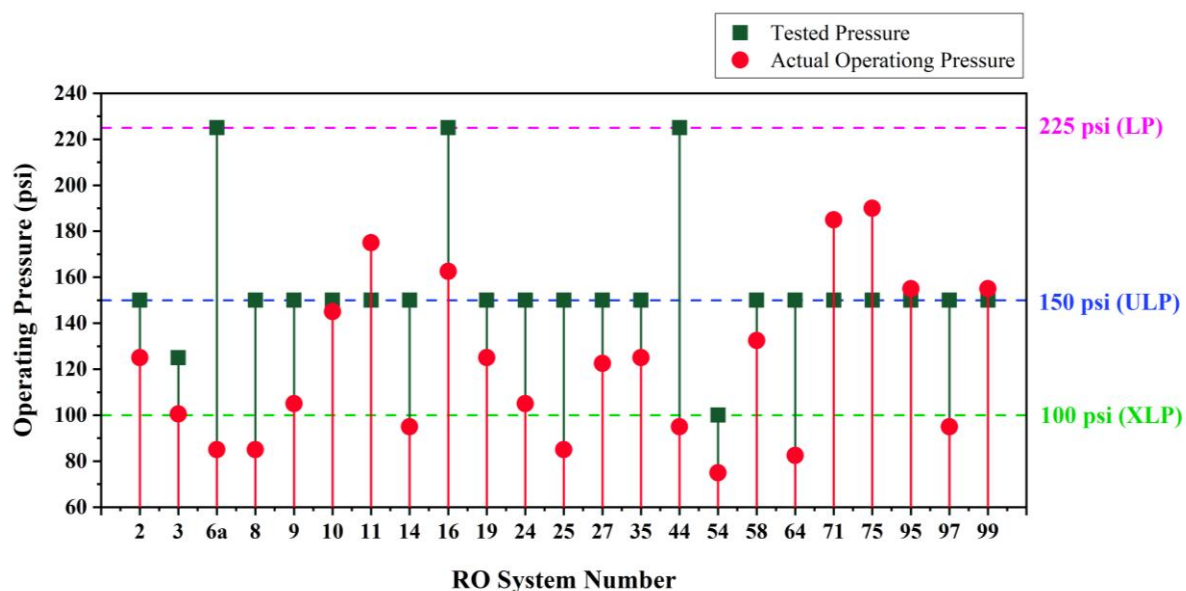

Figure S7. Tested (by manufacturer) operating pressure vs. actual Operating Pressure of selected RO systems in the NCP

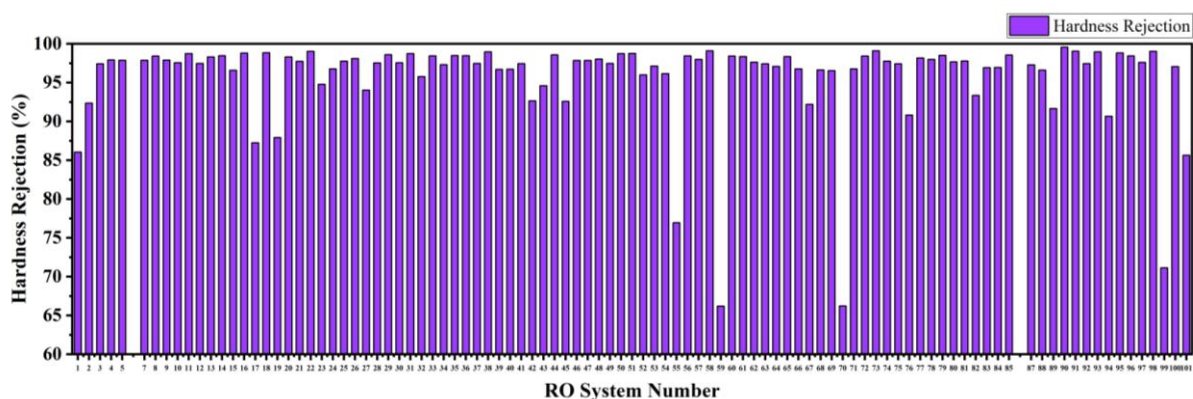

Figure S8. Hardness rejection of each RO station

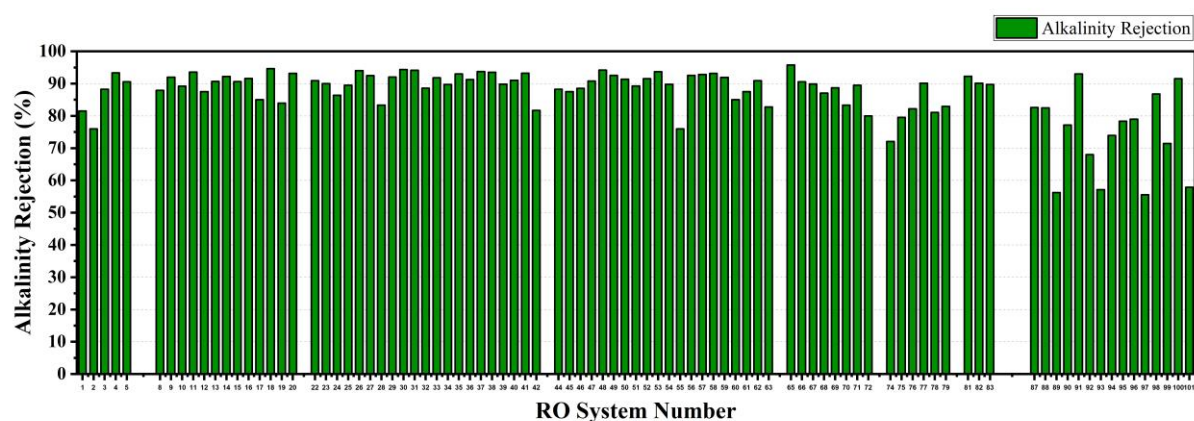

Figure S9. Alkalinity rejection rates of each RO station

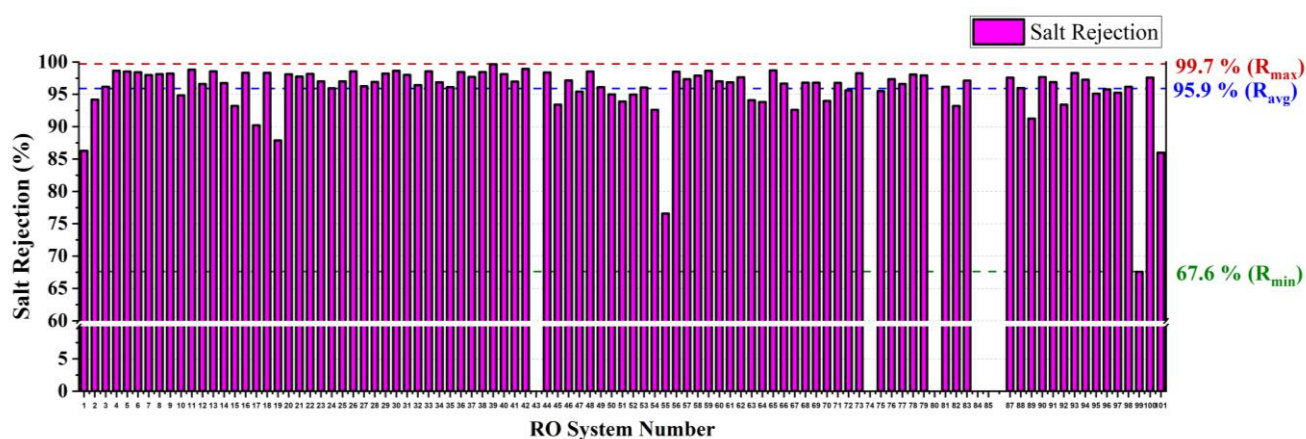

Figure S10. Overall salt rejection for each RO plant (95 ROs) operated under CBOs (x-axis: RO plant number, y-Axis: % salt rejection)

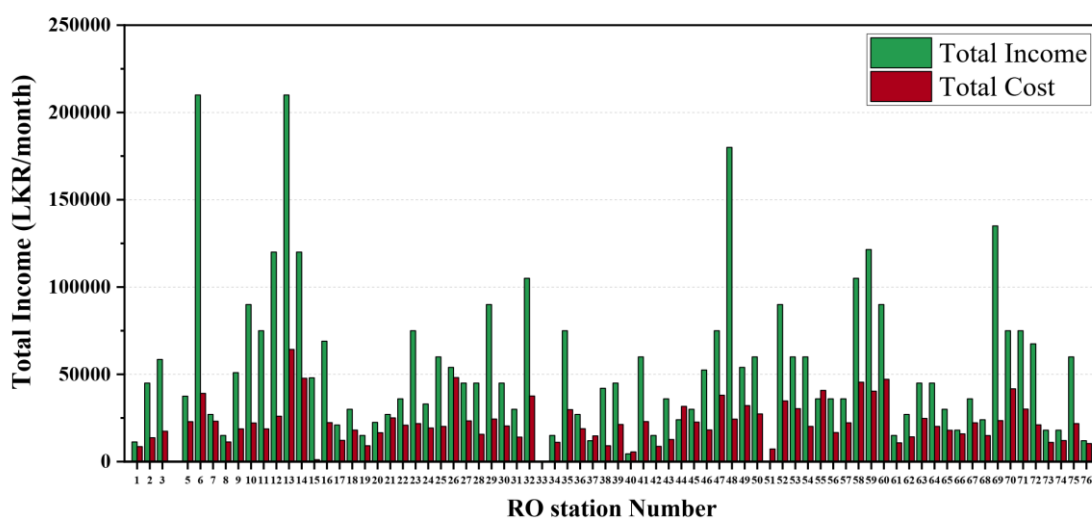

Figure S11. Total income and total operating cost of each RO station in the NCP

**Table S1.** RO Product Water Prices with their Operating Companies

| RO operated Organizations                      | RO Water Price LKR / L |
|------------------------------------------------|------------------------|
| CBOs                                           | 1 – 1.50               |
| Sri Lankan Navy                                | Free of charge         |
| Civil Security Department                      | 0.25 – 1               |
| Private and Commercial Organizations/Companies | 1.50 – 3.5             |

**Table S2.** Diversity of RO system configurations in CBOs in the NCP

| No of Stages | RO skids (Pressure vessels) | No of RO elements | RO skids Arrangements | No of RO stations | Illustrations in Figure S2 |
|--------------|-----------------------------|-------------------|-----------------------|-------------------|----------------------------|
| Single stage | 1                           | 1                 | Single                | 22                | (a)                        |
|              | 2                           | 2                 | Parallel              | 1                 | (c)                        |
| 2-stage      | 2                           | 2                 | Serial                | 43                | (b)                        |
|              |                             | 4                 |                       | 7                 | (f)                        |
|              | 3                           | 3                 | Christmas tree        | 13                | (d)                        |
| 3-stage      | 3                           | 3                 | Serial                | 13                | (e)                        |
| 6-stage      | 6                           | 6                 | Serial                | 1                 |                            |

**Table S3.** Specification data of each RO membrane type used in RO stations in the NCP

| RO membrane Type/Model | Manufacturer     | Salt Rejection     | Tested Pressure (psi) | Salt Concentration (mg/L) | Salt Type | Recovery (Per membrane unit) % |
|------------------------|------------------|--------------------|-----------------------|---------------------------|-----------|--------------------------------|
| ESPA2-LD-4040          | Hydranautics     | 99.6% (99.4% Min)  | 150                   | 1500                      | NaCl      | 15                             |
| ESPA 1-LD-4040         | Hydranautics     | 99.4% (99.2% Min)  | 150                   | 1500                      | NaCl      | 15                             |
| CPA2-4040              | Hydranautics     | 99.5% (99.2% Min)  | 225                   | 1500                      | NaCl      | 15                             |
| LP 21-4040             | VONTRON          | 99.5% (99.3% Min)  | 225                   | 2000                      | NaCl      | 15                             |
| ULP21-4040             | VONTRON          | 99.0% (98.5% Min)  | 150                   | 1500                      | NaCl      | 15                             |
| ULP 3012               | VONTRON          | 97%                | 100                   | 500                       | NaCl      | 15                             |
| RE4040-BN              | CSM, South Korea | 99.7% (Stabilized) | 225                   | 2000                      | NaCl      | 15                             |
| XLE-4040               | DOW Filmtec      | 99% (Stabilized)   | 100                   | 2000                      | NaCl      | 15                             |
| BW30-4040              | DOW Filmtec      | 99.5% (Stabilized) | 225                   | 2000                      | NaCl      | 15                             |
| LC-LE-4040             | DOW Filmtec      | 99.2% (99.1% Min)  | 125                   | 2000                      | NaCl      | 15                             |

**Table S4.** Influence of feed water chemistry for Ion rejection of ESPA2 membranes

| Parameter          | Raw Water EC | [Ca]   | [Mg]   | [Na]   | [K]    | [Li]     | [As]  | [Si]   |
|--------------------|--------------|--------|--------|--------|--------|----------|-------|--------|
| Salt Rejection (%) | 0.182        | -0.173 | 0.147  | 0.243  | 0.21   | -0.078   | 0.075 | -0.086 |
| Ca Rejection %     | 0.195        | 0.354  | 0.189  | 0.134  | 0.044  | 0.068    | 0.328 | -0.058 |
| Mg Rejection %     | 0.008        | -0.261 | -0.042 | 0.093  | 0.149  | -0.244   | 0.17  | -0.275 |
| Na Rejection %     | 0.264        | -0.175 | 0.131  | 0.422  | 0.346  | 0.121    | 0.011 | 0.099  |
| K Rejection %      | 0.41         | 0.093  | 0.465* | 0.374  | 0.363  | 0.107    | 0.315 | 0.004  |
| Li Rejection %     | -0.058       | 0.096  | 0.124  | -0.185 | 0.013  | -0.600** | 0.407 | -0.155 |
| As Rejection %     | -0.158       | 0.21   | 0.08   | -0.247 | -0.376 | 0.199    | 0.314 | -0.086 |
| Si Rejection %     | 0.198        | -0.07  | 0.157  | 0.183  | 0.249  | -0.149   | 0.259 | 0.028  |

\*\* . Correlation is significant at the 0.01 level (2-tailed)

\* . Correlation is significant at the 0.05 level (2-tailed)

**Table S5.** Selected RO membranes for comparison of Individual ion Rejection

| Manufacturer | Membrane Type | Number of RO stations |
|--------------|---------------|-----------------------|
| DOW filmtec  | BW30-4040     | 4                     |
| Hydranautics | ESPA2-LD-4040 | 23                    |
| VONTRON      | ULP21-4040    | 6                     |

**Table S6.** Estimation of Production cost for drinking water in a typical RO station in the NCP

| Category             | Units           | Price per Unit / LKR | Number of units | Cost per month (LKR) |
|----------------------|-----------------|----------------------|-----------------|----------------------|
| Membrane price       | 1 unit          | 40000                | 2               | 3333                 |
| Replacement interval | Year            |                      | 2               |                      |
| Antiscalents         | 1 L             | 1500                 |                 | 500                  |
| Interval             | Months per unit |                      | 3               |                      |
| Resin                | 1 kg            | 500                  | 50              | 1042                 |
| AC                   | 1 kg            | 500                  | 30              | 625                  |
| Sand                 | 1 kg            | 40                   | 25              | 42                   |
| Replacement interval | Year            |                      | 2               |                      |
| Sediment cartridge   | 1 unit          | 450                  | 1               | 450                  |
| Replacement interval | Months          |                      | 1               |                      |

|                    |           |       |    |                     |
|--------------------|-----------|-------|----|---------------------|
| Pumps repair cost  | 1 year    | 5000  |    | 417                 |
| Operational hours  | hour/day  |       | 20 |                     |
| Electricity charge | LKR/month | 20000 |    | 20000               |
| Capacity           | L/day     | 10000 | 30 |                     |
| Operators' salary  | 1 month   | 7500  | 2  | 15000               |
| Extra Expenses     | 1 month   | 2000  |    | 2000                |
| Total monthly cost | LKR/Month |       |    | 43408               |
| Production cost    | LKR/L     |       |    | <u><b>0.145</b></u> |
